# Supplementary material for: Biochar-Mediated Zirconium Ferrite Nanocomposites for Tartrazine Dye Removal from Textile Wastewater
Source: MDPI journal article supplement (doi:10.3390/nano12162828), 2022-08-17
Supplement: s1 [file s1]

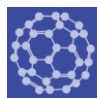

## Article

# Biochar-Mediated Zirconium Ferrite Nanocomposites for Tartrazine Dye Removal from Textile Wastewater

Shazia Perveen <sup>1</sup>, Raziya Nadeem <sup>1</sup>, Farhat Nosheen <sup>2</sup>, Muhammad Imran Asjad <sup>3</sup>, Jan Awrejcewicz <sup>4</sup> and Tauseef Anwar <sup>5,\*</sup>

<sup>1</sup> Department of Chemistry, University of Agriculture, Faisalabad 38000, Pakistan

<sup>2</sup> Institute of Chemistry, University of Sargodha, Sargodha 40100, Pakistan

<sup>3</sup> Department of Mathematics, University of Management and Technology, Lahore 54000, Pakistan

<sup>4</sup> Department of Automation, Biomechanics and Mechatronics, Lodz University of Technology, Żeromskiego 116, 90-924 Łódź, Poland

<sup>5</sup> Department of Physics, The University of Lahore, Lahore 54000, Pakistan

\* Correspondence: tauseef.anwar@phys.uol.edu.pk

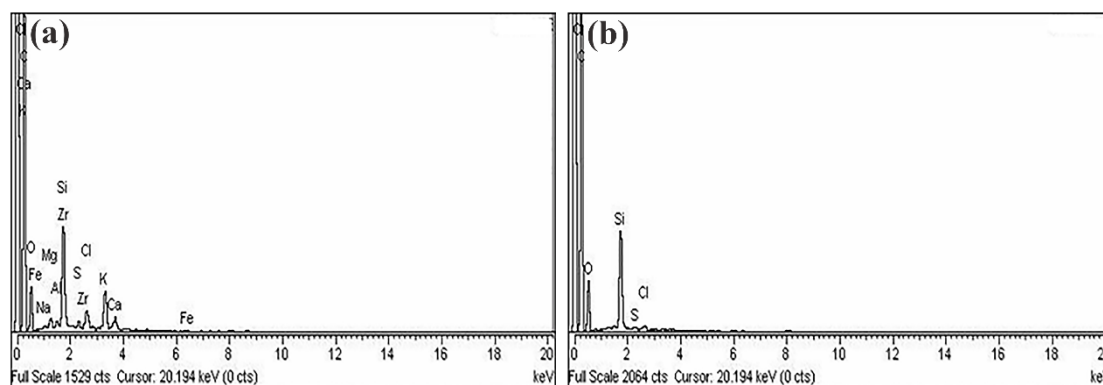

**Figure S1.** EDX spectra of (a) BC-ZrFe<sub>2</sub>O<sub>5</sub> NCs and (b) dye loaded BC-ZrFe<sub>2</sub>O<sub>5</sub> NCs.

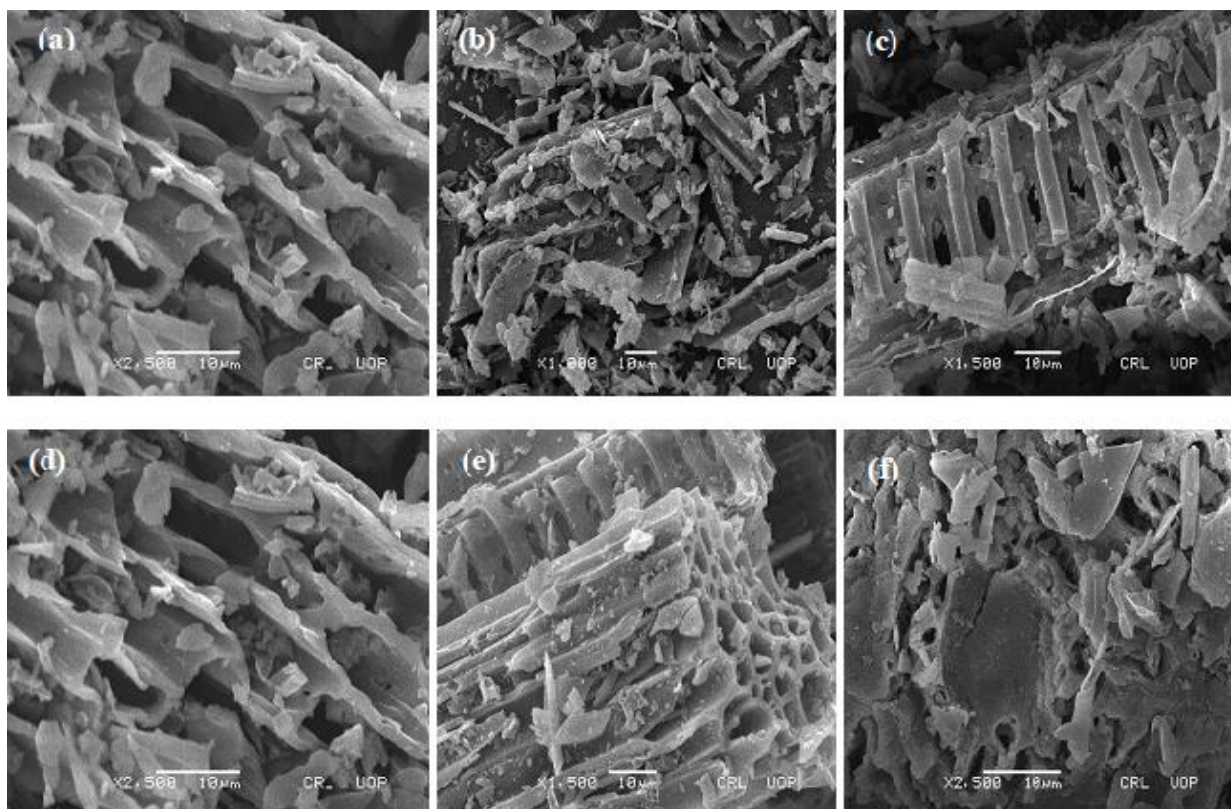

**Figure S2.** SEM micrographs of WSBC (a,b,c) and Tartrazine dye loaded WSBC (d,e,f) at three different magnification levels.

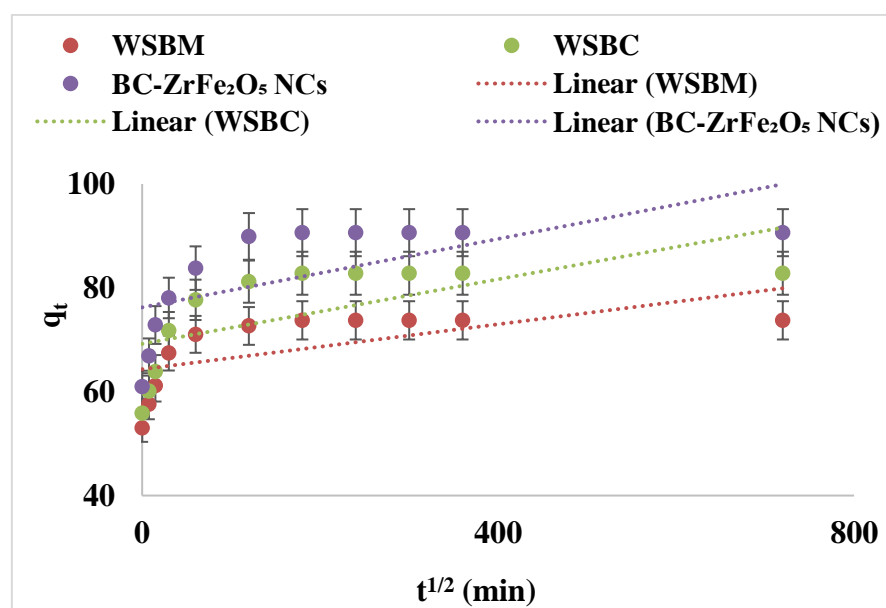

**Figure S3.** Intraparticles diffusion adsorption kinetic model plot for adsorption of Tartrazine dye by WSBM, WSBC, and BC-ZrFe<sub>2</sub>O<sub>5</sub> NCs.

**Table S1.** ANOVA results for Response Surface Quadratic Model of Tartrazine dye using BC-ZrFe<sub>2</sub>O<sub>5</sub> NCs.

| <i>Source</i>             | <i>Sum of Square</i> | <i>Df</i> | <i>Mean Square</i> | <i>F Value</i>             | <i>p-value Prob &gt; F</i> |                 |
|---------------------------|----------------------|-----------|--------------------|----------------------------|----------------------------|-----------------|
| <b>Model</b>              | 14021.71             | 14        | 1001.2             | 18.52                      | < 0.0001                   | Significant     |
| <b>A-pH</b>               | 19.28                | 1         | 19.28              | 0.23                       | < 0.0001                   |                 |
| <b>B-Conc.</b>            | 13796.35             | 1         | 13796.35           | 164.04                     | < 0.0001                   |                 |
| <b>C-Dose</b>             | 2.80                 | 1         | 2.80               | 0.033                      | < 0.0001                   |                 |
| <b>D-Time</b>             | 12160.33             | 1         | 12160.33           | 61                         | < 0.0001                   |                 |
| <b>AB</b>                 | 0.81                 | 1         | 0.81               | 9.289                      | < 0.0001                   |                 |
| <b>AC</b>                 | 1.62                 | 1         | 1.62               | 0.018                      | < 0.0001                   |                 |
| <b>AD</b>                 | 20.25                | 1         | 20.25              | 0.10                       | < 0.001                    |                 |
| <b>BC</b>                 | 1.53                 | 1         | 1.53               | 0.018                      | < 0.005                    |                 |
| <b>BD</b>                 | 3969                 | 1         | 3969               | 20.01                      | < 0.0005                   |                 |
| <b>CD</b>                 | 6.25                 | 1         | 6.25               | 0.32                       | < 0.05                     |                 |
| <b>A<sup>2</sup></b>      | 1.42                 | 1         | 1.42               | 0.017                      | 0.0993                     |                 |
| <b>B<sup>2</sup></b>      | 194.52               | 1         | 194.52             | 2.31                       | 0.0593                     |                 |
| <b>C<sup>2</sup></b>      | 0.68                 | 1         | 0.68               | 8.053                      | 0.0303                     |                 |
| <b>D<sup>2</sup></b>      | 6555.96              | 1         | 6555.96            | 33.05                      | < 0.0001                   |                 |
| <b>Residual</b>           | 841.06               | 14        | 84.11              |                            |                            | non-significant |
| <b>Lack of Fit</b>        | 841.06               | 10        | 168.21             |                            |                            |                 |
| <b>Pure Error</b>         | 0.000                | 4         | 0.000              |                            |                            |                 |
| <b>Cor Total</b>          | 14862.77             | 28        |                    |                            |                            |                 |
| <b>Std.Dev.</b>           | 3.25                 |           |                    | <b>R<sup>2</sup></b>       | 0.9976                     |                 |
| <b>C.V.</b>               | 4.28                 |           |                    | <b>Pred. R<sup>2</sup></b> | 0.9812                     |                 |
| <b>Mean</b>               | 46.98                |           |                    | <b>Adj. R<sup>2</sup></b>  | 0.9953                     |                 |
| <b>Adequate precision</b> | 32.45                |           |                    | <b>Press</b>               | 723                        |                 |

**Table S2.** Comparison between pseudo-first order, pseudo-second-order and intraparticles diffusion kinetic models for Tartrazine Dye.

|               |                                         | Pseudo first order                   |                                       |                | Pseudo second order                    |                                      |                                                          |                | Intraparticle Diffusion                    |                |                |
|---------------|-----------------------------------------|--------------------------------------|---------------------------------------|----------------|----------------------------------------|--------------------------------------|----------------------------------------------------------|----------------|--------------------------------------------|----------------|----------------|
| Sorbate (Dye) | Sorbent                                 | q <sub>e</sub> (mg g <sup>-1</sup> ) | K <sub>1ad</sub> (min <sup>-1</sup> ) | R <sup>2</sup> | q <sub>exp</sub> (mg g <sup>-1</sup> ) | q <sub>e</sub> (mg g <sup>-1</sup> ) | K <sub>2ad</sub> (g mg <sup>-1</sup> min <sup>-1</sup> ) | R <sup>2</sup> | K <sub>pi</sub> (mg/g min <sup>1/2</sup> ) | C <sub>i</sub> | R <sup>2</sup> |
| Tartrazine    | WSBM                                    | 0.706                                | -0.004                                | 0.610          | 66.29                                  | 53.64                                | 0.00289                                                  | 0.997          | 0.0148                                     | -0.213         | 0.996          |
|               | WSBC                                    | 0.058                                | -0.001                                | 0.132          | 73.74                                  | 79.49                                | 0.00056                                                  | 0.998          | 0.013                                      | -0.164         | 0.996          |
|               | BC-ZrFe <sub>2</sub> O <sub>5</sub> NCs | 8.496                                | -0.001                                | 0.533          | 82.811                                 | 89.22                                | -0.0005                                                  | 0.999          | 0.011                                      | 0.058          | 0.989          |

**Table S3.** Equilibrium isotherm parameters for Tartrazine Dye.

| Sorbate<br>(Dye) | Sorbent                                        | Langmuir model                 |                                |        | Freundlich model                   |                                |      |                                |        |
|------------------|------------------------------------------------|--------------------------------|--------------------------------|--------|------------------------------------|--------------------------------|------|--------------------------------|--------|
|                  |                                                | $X_m$<br>(mg g <sup>-1</sup> ) | $K_L$<br>(L mg <sup>-1</sup> ) | $R^2$  | $q_{exp}$<br>(mg g <sup>-1</sup> ) | $q_e$<br>(mg g <sup>-1</sup> ) | 1/n  | $K_F$<br>(mg g <sup>-1</sup> ) | $R^2$  |
| Tartrazine       | WSBM                                           | 111.12                         | 0.060                          | 0.8671 | 66.29                              | 53.64                          | 0.49 | 0.077                          | 0.9895 |
|                  | WSBC                                           | 144.93                         | 0.055                          | 0.8608 | 73.74                              | 79.47                          | 0.63 | 0.025                          | 0.9899 |
|                  | BC-<br>ZrFe <sub>2</sub> O <sub>5</sub><br>NCs | 232.56                         | 0.039                          | 0.7174 | 83.81                              | 89.22                          | 0.77 | 0.012                          | 0.9907 |
